# Supplementary material
Source: PubMed Central journal article supplement (PMC7969389)
Supplement: NIHMS1653167-supplement-1.pdf [file NIHMS1653167-supplement-1.pdf]

Supplementary Table 1. Results of the linear regression models of motor function (regardless of age).

| PANESS           |                                |              |             |                 |                  |                       |
|------------------|--------------------------------|--------------|-------------|-----------------|------------------|-----------------------|
| outcome          | Predictor                      | Coefficient  | SE          | <i>t</i> -value | <i>p</i> -value  | 95% CI                |
| Total timed      | <b>TD Boy</b>                  | <b>6.75</b>  | <b>0.66</b> | <b>10.2</b>     | <b>&lt;0.001</b> | <b>(5.44, 8.05)</b>   |
| overflow         | <b>ADHD Boy</b>                | <b>11.95</b> | <b>0.54</b> | <b>22.19</b>    | <b>&lt;0.001</b> | <b>(10.89, 13.01)</b> |
|                  | <b>TD Girl</b>                 | <b>7.17</b>  | <b>0.84</b> | <b>8.58</b>     | <b>&lt;0.001</b> | <b>(5.52, 8.81)</b>   |
|                  | <b>ADHD Girl</b>               | <b>10.21</b> | <b>0.74</b> | <b>13.73</b>    | <b>&lt;0.001</b> | <b>(8.74, 11.67)</b>  |
|                  | <b>TD-Boys vs. ADHD-Boys</b>   | <b>5.2</b>   | <b>0.85</b> | <b>6.1</b>      | <b>&lt;0.001</b> | <b>(3.52, 6.88)</b>   |
|                  | <b>TD-Girls vs. ADHD-Girls</b> | <b>3.04</b>  | <b>1.12</b> | <b>2.72</b>     | <b>0.007</b>     | <b>(0.84, 5.24)</b>   |
|                  | TD-Girls vs. TD-Boys           | 0.42         | 1.07        | 0.39            | 0.690            | (-1.68, 2.52)         |
|                  | ADHD-Girls vs. ADHD Boys       | -1.74        | 0.92        | -1.9            | 0.060            | (-3.55, 0.06)         |
| Total            | <b>TD Boy</b>                  | <b>4.21</b>  | <b>0.33</b> | <b>12.93</b>    | <b>&lt;0.001</b> | <b>(3.57, 4.85)</b>   |
| dysrhythmia      | <b>ADHD Boy</b>                | <b>5.42</b>  | <b>0.26</b> | <b>20.55</b>    | <b>&lt;0.001</b> | <b>(4.9, 5.94)</b>    |
|                  | <b>TD Girl</b>                 | <b>3.69</b>  | <b>0.41</b> | <b>8.98</b>     | <b>&lt;0.001</b> | <b>(2.88, 4.5)</b>    |
|                  | <b>ADHD Girl</b>               | <b>5.58</b>  | <b>0.37</b> | <b>15.26</b>    | <b>&lt;0.001</b> | <b>(4.86, 6.31)</b>   |
|                  | <b>TD-Boys vs. ADHD-Boys</b>   | <b>1.21</b>  | <b>0.42</b> | <b>2.89</b>     | <b>&lt;0.001</b> | <b>(0.39, 2.04)</b>   |
|                  | <b>TD-Girls vs. ADHD-Girls</b> | <b>1.89</b>  | <b>0.55</b> | <b>3.44</b>     | <b>&lt;0.001</b> | <b>(0.81, 2.98)</b>   |
|                  | TD-Girls vs. TD-Boys           | -0.52        | 0.52        | -0.99           | 0.320            | (-1.55, 0.51)         |
|                  | ADHD-Girls vs. ADHD Boys       | 0.16         | 0.45        | 0.36            | 0.720            | (-0.73, 1.05)         |
| Total time       | <b>TD Boy</b>                  | <b>28.18</b> | <b>0.7</b>  | <b>40.27</b>    | <b>&lt;0.001</b> | <b>(26.8, 29.55)</b>  |
| Repetitive tasks | <b>ADHD Boy</b>                | <b>30.17</b> | <b>0.57</b> | <b>53.2</b>     | <b>&lt;0.001</b> | <b>(29.05, 31.29)</b> |
|                  | <b>TD Girl</b>                 | <b>29.13</b> | <b>0.88</b> | <b>32.97</b>    | <b>&lt;0.001</b> | <b>(27.39, 30.87)</b> |

|            |                                 |              |             |              |                  |                       |
|------------|---------------------------------|--------------|-------------|--------------|------------------|-----------------------|
|            | <b>ADHD Girl</b>                | <b>32.7</b>  | <b>0.79</b> | <b>41.57</b> | <b>&lt;0.001</b> | <b>(31.16, 34.25)</b> |
|            | TD-Boys vs. ADHD-Boys           | 1.99         | 0.9         | 2.21         | 0.030            | (0.22, 3.77)          |
|            | <b>TD-Girls vs. ADHD-Girls</b>  | <b>3.57</b>  | <b>1.18</b> | <b>3.02</b>  | <b>0.003</b>     | <b>(1.24, 5.9)</b>    |
|            | TD-Girls vs. TD-Boys            | 0.96         | 1.13        | 0.85         | 0.400            | (-1.26, 3.18)         |
|            | <b>ADHD-Girls vs. ADHD Boys</b> | <b>2.54</b>  | <b>0.97</b> | <b>2.61</b>  | <b>0.009</b>     | <b>(0.63, 4.45)</b>   |
| Total time | <b>TD Boy</b>                   | <b>38.85</b> | <b>1.19</b> | <b>32.65</b> | <b>&lt;0.001</b> | <b>(36.51, 41.2)</b>  |
| Sequential | <b>ADHD Boy</b>                 | <b>40.46</b> | <b>0.96</b> | <b>41.95</b> | <b>&lt;0.001</b> | <b>(38.56, 42.36)</b> |
| tasks      | <b>TD Girl</b>                  | <b>37.47</b> | <b>1.5</b>  | <b>24.93</b> | <b>&lt;0.001</b> | <b>(34.51, 40.43)</b> |
|            | <b>ADHD Girl</b>                | <b>42.2</b>  | <b>1.34</b> | <b>31.54</b> | <b>&lt;0.001</b> | <b>(39.57, 44.84)</b> |
|            | TD-Boys vs. ADHD-Boys           | 1.61         | 1.53        | 1.05         | 0.300            | (-1.41, 4.62)         |
|            | TD-Girls vs. ADHD-Girls         | 4.73         | 2.01        | 2.35         | 0.019            | (0.77, 8.69)          |
|            | TD-Girls vs. TD-Boys            | -1.38        | 1.92        | -0.72        | 0.470            | (-5.16, 2.39)         |
|            | ADHD-Girls vs. ADHD Boys        | 1.74         | 1.65        | 1.06         | 0.290            | (-1.51, 4.99)         |

---

Statistically significant effects ( $p < .01$ ) appear in bold. SE: standard error; CI: Confidence interval.

Supplementary Table 2. Developmental trajectory results of the linear mixed models of motor function.

| PANESS                            |                              |              |             |              |                  |                       |
|-----------------------------------|------------------------------|--------------|-------------|--------------|------------------|-----------------------|
| outcome                           | Predictor                    | Coefficient  | SE          | t-value      | p-value          | 95% CI                |
| Total timed<br>overflow           | <b>TD Boy</b>                | <b>-0.45</b> | <b>0.19</b> | <b>-2.44</b> | <b>0.010</b>     | <b>(-0.82, -0.09)</b> |
|                                   | <b>ADHD Boy</b>              | <b>-1.34</b> | <b>0.16</b> | <b>-8.27</b> | <b>&lt;0.001</b> | <b>(-1.66, -1.03)</b> |
|                                   | <b>TD Girl</b>               | <b>-0.78</b> | <b>0.23</b> | <b>-3.38</b> | <b>&lt;0.001</b> | <b>(-1.23, -0.33)</b> |
|                                   | <b>ADHD Girl</b>             | <b>-0.93</b> | <b>0.18</b> | <b>-5.1</b>  | <b>&lt;0.001</b> | <b>(-1.29, -0.57)</b> |
|                                   | <b>TD-Boys vs. ADHD-Boys</b> | <b>-0.89</b> | <b>0.25</b> | <b>-3.61</b> | <b>&lt;0.001</b> | <b>(-1.37, -0.41)</b> |
|                                   | TD-Girls vs. ADHD-Girls      | -0.15        | 0.29        | -0.51        | 0.610            | (-0.73, 0.42)         |
|                                   | TD-Girls vs. TD-Boys         | -0.33        | 0.3         | -1.1         | 0.270            | (-0.9, 0.25)          |
|                                   | ADHD-Girls vs. ADHD Boys     | 0.41         | 0.24        | 1.7          | 0.090            | (-0.06, 0.89)         |
| Total<br>dysrhythmia              | <b>TD Boy</b>                | <b>-0.45</b> | <b>0.1</b>  | <b>-4.52</b> | <b>&lt;0.001</b> | <b>(-0.64, -0.25)</b> |
|                                   | <b>ADHD Boy</b>              | <b>-0.59</b> | <b>0.09</b> | <b>-6.78</b> | <b>&lt;0.001</b> | <b>(-0.76, -0.42)</b> |
|                                   | <b>TD Girl</b>               | <b>-0.4</b>  | <b>0.12</b> | <b>-3.24</b> | <b>&lt;0.001</b> | <b>(-0.64, -0.16)</b> |
|                                   | <b>ADHD Girl</b>             | <b>-0.41</b> | <b>0.1</b>  | <b>-4.16</b> | <b>&lt;0.001</b> | <b>(-0.6, -0.22)</b>  |
|                                   | TD-Boys vs. ADHD-Boys        | -0.14        | 0.13        | -1.06        | 0.290            | (-0.4, 0.12)          |
|                                   | TD-Girls vs. ADHD-Girls      | -0.01        | 0.16        | -0.05        | 0.960            | (-0.32, 0.3)          |
|                                   | TD-Girls vs. TD-Boys         | 0.05         | 0.16        | 0.29         | 0.770            | (-0.26, 0.36)         |
|                                   | ADHD-Girls vs. ADHD Boys     | 0.18         | 0.13        | 1.35         | 0.180            | (-0.08, 0.43)         |
| Total time<br>Repetitive<br>tasks | <b>TD Boy</b>                | <b>-1.4</b>  | <b>0.19</b> | <b>-7.17</b> | <b>&lt;0.001</b> | <b>(-1.78, -1.02)</b> |
|                                   | <b>ADHD Boy</b>              | <b>-1.22</b> | <b>0.17</b> | <b>-7.17</b> | <b>&lt;0.001</b> | <b>(-1.56, -0.89)</b> |
|                                   | <b>TD Girl</b>               | <b>-1.47</b> | <b>0.24</b> | <b>-6.01</b> | <b>&lt;0.001</b> | <b>(-1.95, -0.99)</b> |

|            |                          |              |             |              |                  |                       |
|------------|--------------------------|--------------|-------------|--------------|------------------|-----------------------|
|            | <b>ADHD Girl</b>         | <b>-1.4</b>  | <b>0.2</b>  | <b>-7.18</b> | <b>&lt;0.001</b> | <b>(-1.78, -1.02)</b> |
|            | TD-Boys vs. ADHD-Boys    | 0.17         | 0.26        | 0.67         | 0.500            | (-0.34, 0.68)         |
|            | TD-Girls vs. ADHD-Girls  | 0.07         | 0.31        | 0.22         | 0.820            | (-0.54, 0.68)         |
|            | TD-Girls vs. TD-Boys     | -0.07        | 0.31        | -0.23        | 0.820            | (-0.69, 0.54)         |
|            | ADHD-Girls vs. ADHD Boys | -0.18        | 0.26        | -0.68        | 0.500            | (-0.68, 0.33)         |
| Total time | <b>TD Boy</b>            | <b>-2.35</b> | <b>0.3</b>  | <b>-7.71</b> | <b>&lt;0.001</b> | <b>(-2.95, -1.75)</b> |
| Sequential | <b>ADHD Boy</b>          | <b>-2.39</b> | <b>0.26</b> | <b>-9.06</b> | <b>&lt;0.001</b> | <b>(-2.91, -1.87)</b> |
| tasks      | <b>TD Girl</b>           | <b>-1.95</b> | <b>0.38</b> | <b>-5.18</b> | <b>&lt;0.001</b> | <b>(-2.69, -1.22)</b> |
|            | <b>ADHD Girl</b>         | <b>-2.21</b> | <b>0.3</b>  | <b>-7.41</b> | <b>&lt;0.001</b> | <b>(-2.8, -1.63)</b>  |
|            | TD-Boys vs. ADHD-Boys    | -0.04        | 0.4         | -0.11        | 0.920            | (-0.83, 0.75)         |
|            | TD-Girls vs. ADHD-Girls  | -0.26        | 0.48        | -0.53        | 0.590            | (-1.2, 0.69)          |
|            | TD-Girls vs. TD-Boys     | 0.39         | 0.49        | 0.81         | 0.420            | (-0.56, 1.35)         |
|            | ADHD-Girls vs. ADHD Boys | 0.18         | 0.4         | 0.45         | 0.650            | (-0.6, 0.96)          |

---

Statistically significant effects ( $p < .01$ ) appear in bold. SE: standard error; CI: Confidence interval.

Supplementary Table 3. Diagnosis and sex effect results of the linear mixed-effects models examining motor function (regardless of age).

Statistically significant effects ( $p < .01$ ) appear in bold. SE: standard error.

Note, diagnosis (0 - TD, 1 - ADHD) and sex (0 - boys, 1 - girls) were binary dummy-coded variables. For the age variable, the minimum age (8.02 years) was subtracted across all participants.

| PANESS outcome       | Predictor        | Coefficient | SE          | <i>t</i> -value | <i>p</i> -value  |
|----------------------|------------------|-------------|-------------|-----------------|------------------|
| Total timed overflow | <b>Diagnosis</b> | <b>5.2</b>  | <b>0.85</b> | <b>6.1</b>      | <b>&lt;0.001</b> |
|                      | Sex              | 0.42        | 1.07        | 0.4             | 0.693            |
|                      | Diagnosis*Sex    | -2.16       | 1.41        | -1.54           | 0.125            |
| Total dysrhythmia    | <b>Diagnosis</b> | <b>1.21</b> | <b>0.42</b> | <b>2.89</b>     | <b>0.004</b>     |
|                      | Sex              | -0.52       | 0.52        | -0.99           | 0.324            |
|                      | Diagnosis*Sex    | 0.68        | 0.69        | 0.99            | 0.325            |
| Total time           | Diagnosis        | 1.99        | 0.9         | 2.21            | 0.028            |
| Repetitive tasks     | Sex              | 0.96        | 1.13        | 0.85            | 0.396            |
|                      | Diagnosis*Sex    | 1.58        | 1.49        | 1.06            | 0.290            |
| Total time           | Diagnosis        | 1.61        | 1.53        | 1.05            | 0.295            |
| Sequential tasks     | Sex              | -1.38       | 1.92        | -0.72           | 0.472            |
|                      | Diagnosis*Sex    | 3.12        | 2.53        | 1.24            | 0.218            |

Supplementary Table 4. Diagnosis and sex effect results of the linear mixed-effects models

examining the developmental trajectory of motor function. Statistically significant effects ( $p < .01$ ) appear in bold. SE: standard error.

Note, diagnosis (0 - TD, 1 - ADHD) and sex (0 - boys, 1 - girls) were binary dummy-coded variables. For the age variable, the minimum age (8.02 years) was subtracted across all participants.

| PANESS outcome    | Predictor            | Coefficient | SE   | DF  | <i>t</i> -value | <i>p</i> -value  |
|-------------------|----------------------|-------------|------|-----|-----------------|------------------|
| Total timed       | <b>Diagnosis</b>     | 8.82        | 1.46 | 114 | 6.04            | <b>&lt;0.001</b> |
| overflow          | Sex                  | 1.63        | 1.75 | 114 | 0.93            | 0.353            |
|                   | Age                  | -0.45       | 0.19 | 141 | -2.44           | 0.016            |
|                   | Diagnosis*Sex        | -5.36       | 2.24 | 114 | -2.39           | 0.018            |
|                   | <b>Diagnosis*Age</b> | -0.89       | 0.25 | 141 | -3.61           | <b>&lt;0.001</b> |
|                   | Sex*Age              | -0.33       | 0.3  | 141 | -1.1            | 0.272            |
|                   | Diagnosis*Sex*Age    | 0.74        | 0.38 | 141 | 1.93            | 0.055            |
| Total dysrhythmia | Diagnosis            | 1.54        | 0.74 | 114 | 2.07            | 0.04             |
|                   | Sex                  | -1.02       | 0.89 | 114 | -1.15           | 0.253            |
|                   | <b>Age</b>           | -0.45       | 0.1  | 142 | -4.52           | <b>&lt;0.001</b> |
|                   | Diagnosis*Sex        | 0.29        | 1.14 | 114 | 0.26            | 0.798            |
|                   | Diagnosis*Age        | -0.14       | 0.13 | 142 | -1.06           | 0.292            |
|                   | Sex*Age              | 0.05        | 0.16 | 142 | 0.29            | 0.770            |
|                   | Diagnosis*Sex*Age    | 0.13        | 0.21 | 142 | 0.63            | 0.526            |
| Total time        | Diagnosis            | 0.43        | 1.44 | 114 | 0.3             | 0.764            |
| Repetitive tasks  | Sex                  | 0.32        | 1.72 | 114 | 0.18            | 0.855            |

|                  |                   |       |      |     |       |                  |
|------------------|-------------------|-------|------|-----|-------|------------------|
|                  | <b>Age</b>        | -1.4  | 0.19 | 142 | -7.17 | <b>&lt;0.001</b> |
|                  | Diagnosis*Sex     | 2.61  | 2.2  | 114 | 1.18  | 0.239            |
|                  | Diagnosis*Age     | 0.17  | 0.26 | 142 | 0.67  | 0.506            |
|                  | Sex*Age           | -0.07 | 0.31 | 142 | -0.23 | 0.817            |
|                  | Diagnosis*Sex*Age | -0.1  | 0.41 | 142 | -0.25 | 0.801            |
| Total time       | Diagnosis         | 0.34  | 2.41 | 114 | 0.14  | 0.889            |
| Sequential tasks | Sex               | -4.77 | 2.88 | 114 | -1.66 | 0.101            |
|                  | <b>Age</b>        | -2.35 | 0.3  | 142 | -7.71 | <b>&lt;0.001</b> |
|                  | Diagnosis*Sex     | 5.07  | 3.69 | 114 | 1.37  | 0.173            |
|                  | Diagnosis*Age     | -0.04 | 0.4  | 142 | -0.11 | 0.916            |
|                  | Sex*Age           | 0.39  | 0.49 | 142 | 0.81  | 0.417            |
|                  | Diagnosis*Sex*Age | -0.21 | 0.63 | 142 | -0.34 | 0.734            |

---

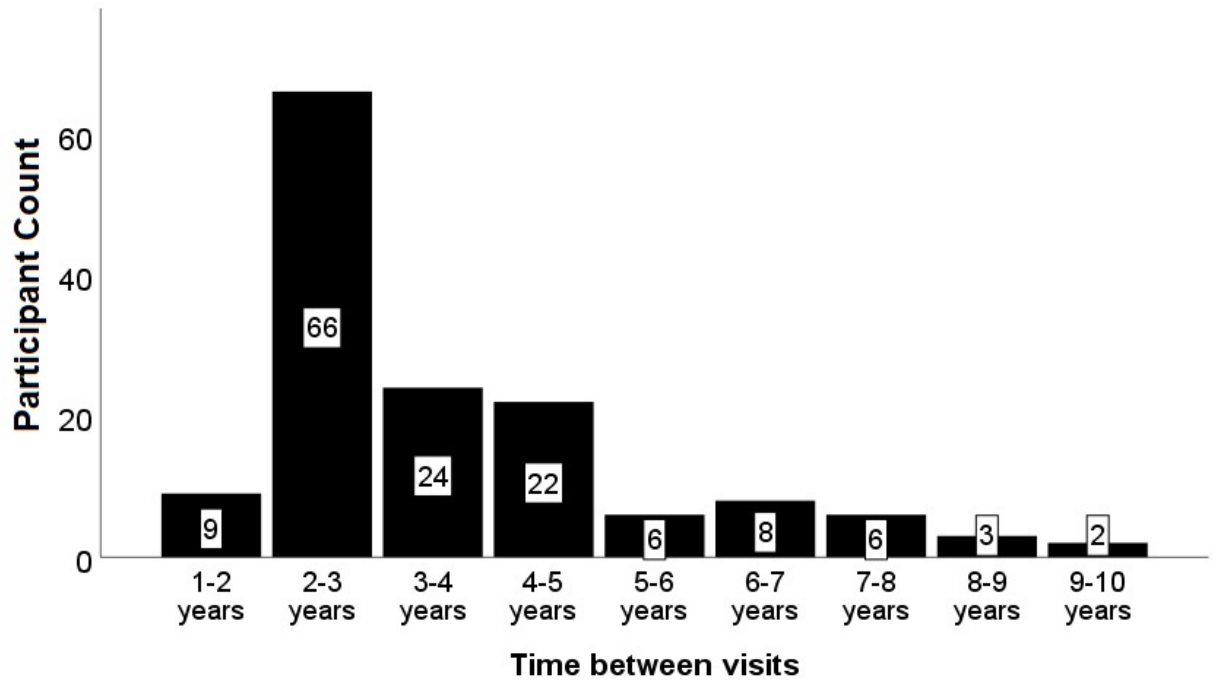



**Figure legends**

Supplementary Figure: Bar graph of time between study visits for all study participants.
